# Supplementary material
Source: PubMed Central journal article supplement (PMC2905252)
Supplement: emboj201017s1.pdf [file emboj201017s1.pdf]

## Supplementary Figures

### Supplementary Figure S1

**Depletion of TIP5 upregulates 45S pre-rRNA transcription levels.** (A) Western blot of nuclei extracts from shRNA-TIP-1 and -2 and shRNA control cells using anti-TIP5 and anti-UBF antibodies. (B) qRT-PCR of TIP5 mRNA from shRNA-TIP5 and control cells. Values were normalized to GAPDH mRNA levels. Depletion of TIP5 enhances rDNA transcription. qRT-PCR. 45S pre-rRNA levels in stable shRNA-TIP5 cells (C) and in NIH3T3 10 days after infection with a retrovirus expressing miRNA sequences directed against TIP5 (D). Values were normalized to GAPDH mRNA levels and to control cells. Error bars are defined as the s.d. of three independent experiments.

### Supplementary Figure S2

(A) Western blot showing similar levels of CENP-A protein in both shRNA-control and shRNA-TIP5 cells. To normalize protein loading, the levels of tubulin were monitored using an anti-tubulin antibody. (B) Cellular localization of centromeres in NIH3T3 cells. Indirect immunofluorescence analysis of NIH3T3 cells with anti-UBF and anti-CENP-A antibodies. The merge panel shows co-localization of some centromeres with the perinucleolar periphery.

### Supplementary Figure S3

Profile of S-phase progression of shRNA-TIP5 and control cells. FACS analysis. Cells were maintained at confluence in DMEM/10% FCS for 2 days before reseeding ( $2 \cdot 10^6$  cells in a 10 cm diameter dish) and culturing for 18 h in medium containing 1  $\mu\text{g/ml}$  aphidicolin (Sigma) to arrest cells at G1/S phase boundary. After release from the aphidicolin block, cells were collected at the indicated times for FACS analysis.

### Supplementary Figure S4

rDNA polymorphism at +42/+43 marks rDNA variants. (A) Schema representing rDNA polymorphisms at +42/+43 (A, T and G sequences). Arrows indicate PCR primers used to amplify rDNA sequences from -165 to +83 (total rDNA) and from -165 to +64 (A, T and

G-sequences). **(B)** rDNA variant sequences. rDNA sequences were amplified from -1 to +155 from NIH3T3 genomic DNA. PCR product was directly sequenced and the region from +32 to +50 is shown. Sequences of plasmids containing rDNA-A and -T are shown. **(C)** Establishment of a polymorphic-specific qPCR. Specificity of the primers was assayed by amplification of v-rDNA plasmids. Values were normalized to the amounts amplified with total rDNA primer. **(D)** CpG methylation profile of v-rDNA variants from mouse liver (L), brain (B) and heart (H). **(E)** Depletion of TIP5 upregulates rDNA transcription at all v-rDNA genes. qRT-PCR from rRNA synthesized by v-rDNA in NIH3T3 cells 10 days after infection with a retrovirus expressing miRNA-TIP5. Data were normalized to GAPDH mRNA levels and to control cells.

### **Supplementary Figure S5**

**(A)** BrdU incorporation assay. Cells were incubated with 10  $\mu$ M BrdU for 30 min, stained with antibodies against BrdU, and percentage of cells in S phase of two independent experiments was estimated. **(B)** Western blot of cellular lysates from shRNA-control and shRNA-TIP5 cells using antibodies against Cyclin A. Anti-actin antibodies were used to ensure that equal amounts of proteins were analyzed.

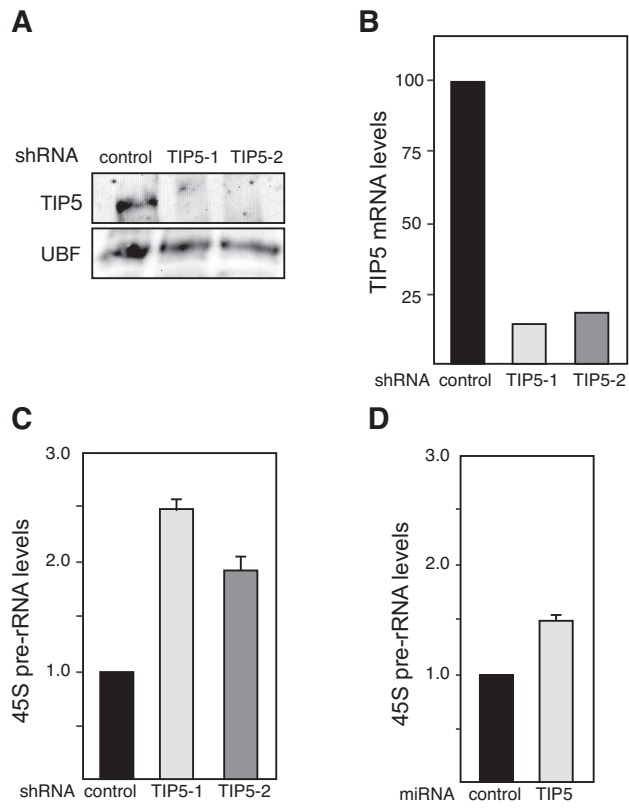

Supplementary Figure S1

**A**

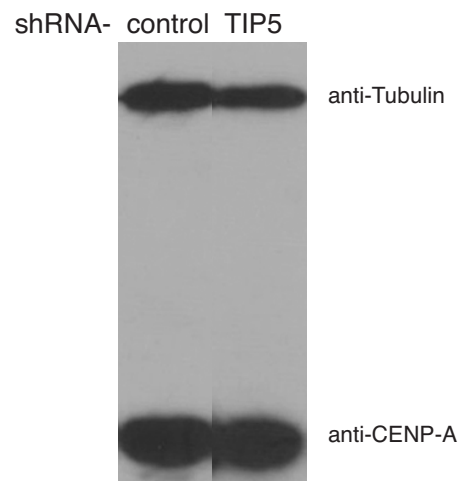

**B**

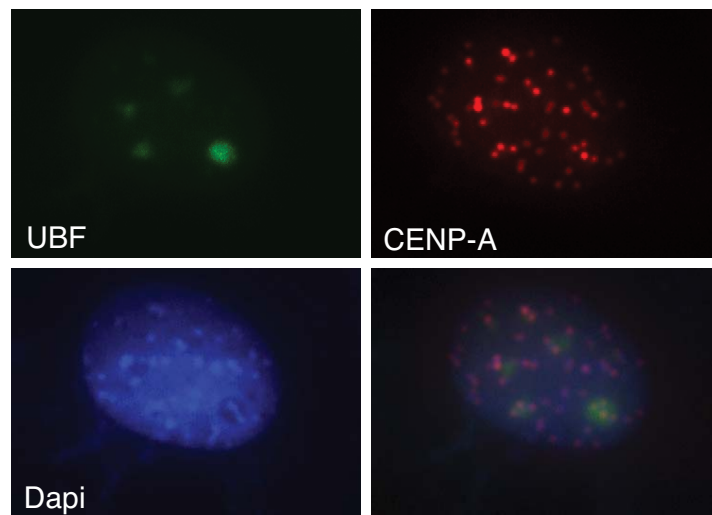

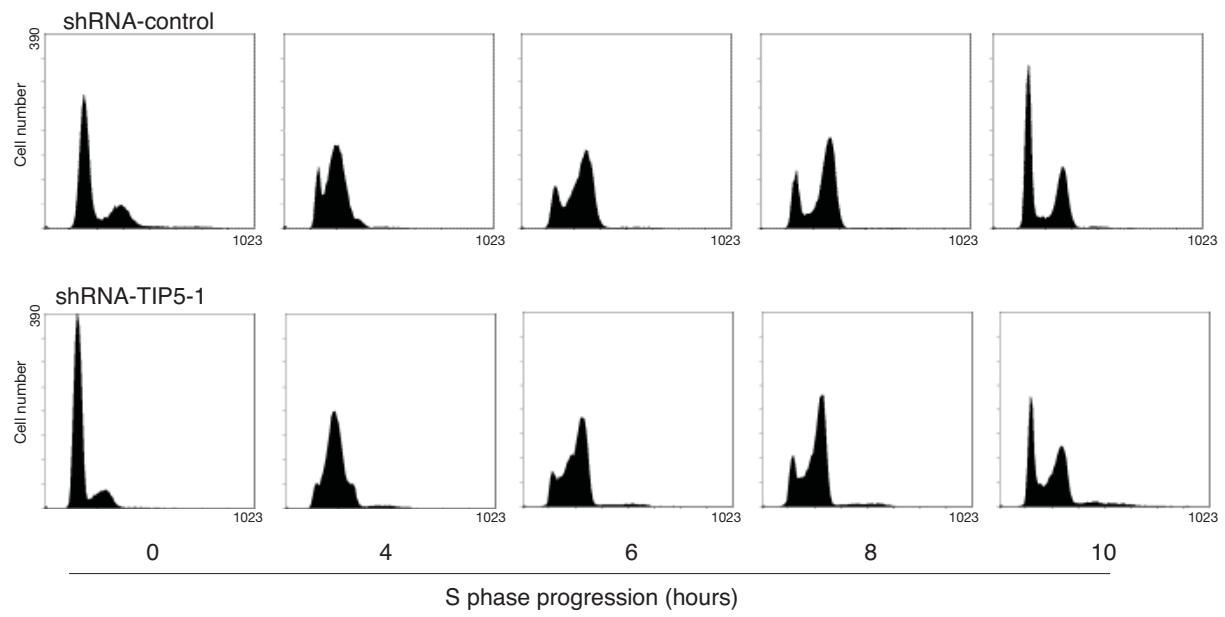

Supplementary Figure S3

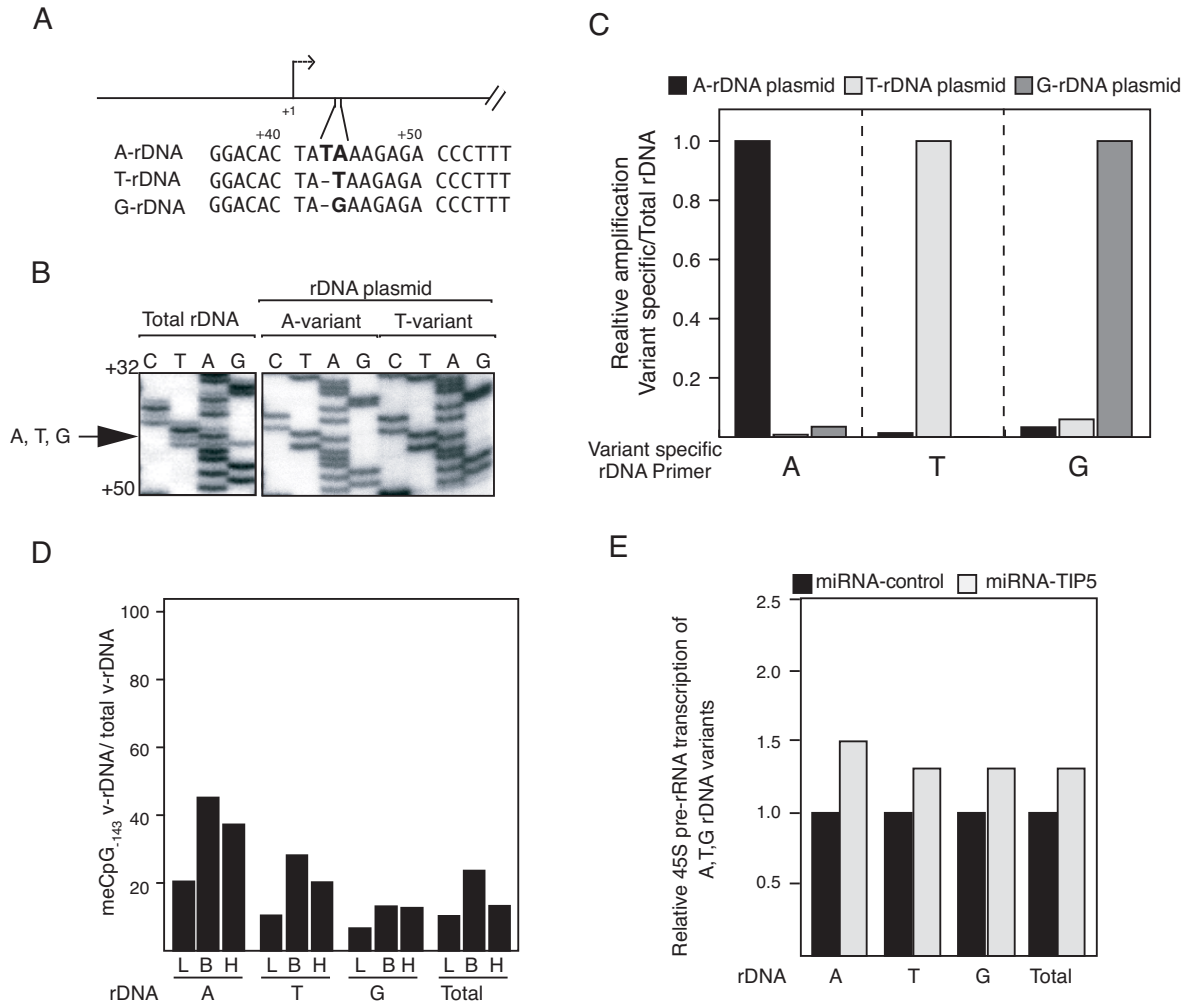

Supplementary Figure S4

A

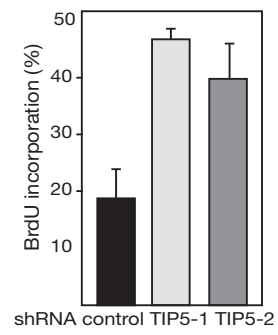

B

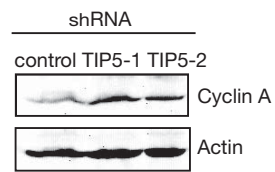

Supplementary Figure S5
